# Supplementary material for: Molecular distribution and compound-specific stable carbon isotopic composition of dicarboxylic acids, oxocarboxylic acids and α -dicarbonyls in PM 2.5 from Beijing, China
Source: Copernicus journal article supplement (doi:10.5194/acp-18-2749-2018), 2018-02-27
Supplement: Supplementary file [file acp-18-2749-2018-supplement.pdf]

Supplement of Atmos. Chem. Phys., 18, 2749–2767, 2018  
<https://doi.org/10.5194/acp-18-2749-2018-supplement>  
© Author(s) 2018. This work is distributed under  
the Creative Commons Attribution 3.0 License.

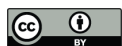

*Supplement of*

**Molecular distribution and compound-specific stable carbon isotopic composition of dicarboxylic acids, oxocarboxylic acids and  $\alpha$ -dicarbonyls in PM<sub>2.5</sub> from Beijing, China**

**Wanyu Zhao et al.**

*Correspondence to:* Pingqing Fu ([fupingqing@mail.iap.ac.cn](mailto:fupingqing@mail.iap.ac.cn), [fupingqing@tju.edu.cn](mailto:fupingqing@tju.edu.cn))

The copyright of individual parts of the supplement might differ from the CC BY 3.0 License.

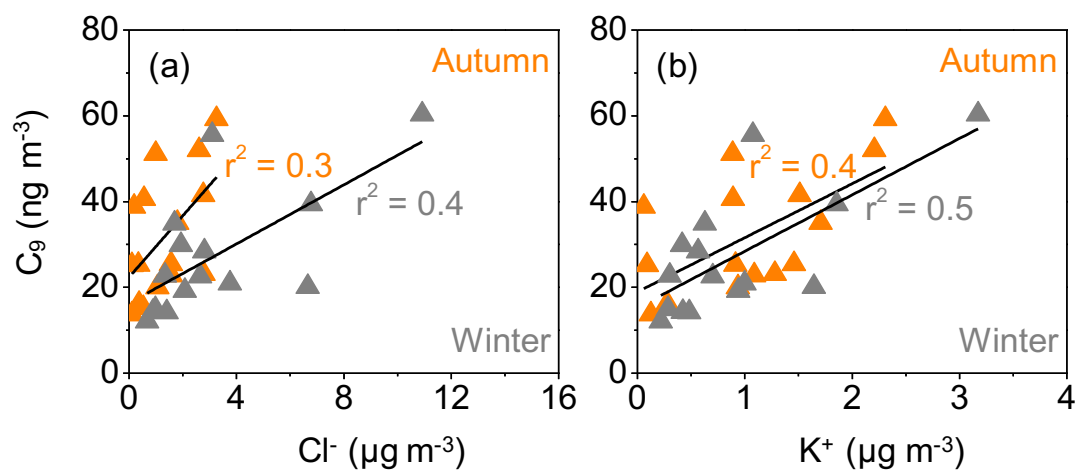

Figure S1. Relations between  $C_9$  and  $Cl^-$ ,  $C_9$  and  $K^+$  concentrations during cold seasons.

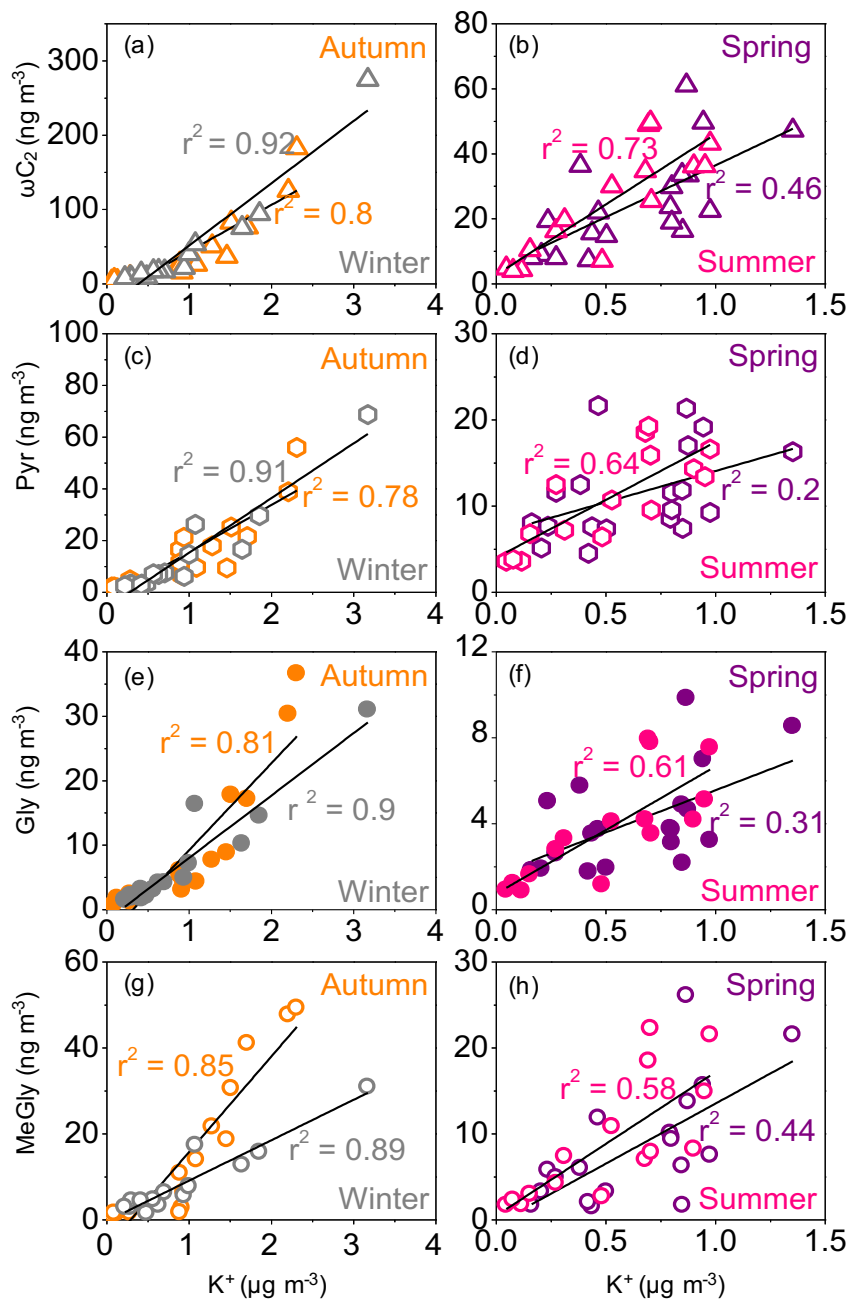

Figure S2. Seasonal relations between  $\omega\text{C}_2$ , Pyr, Gly, MeGly and  $\text{K}^+$  concentrations.

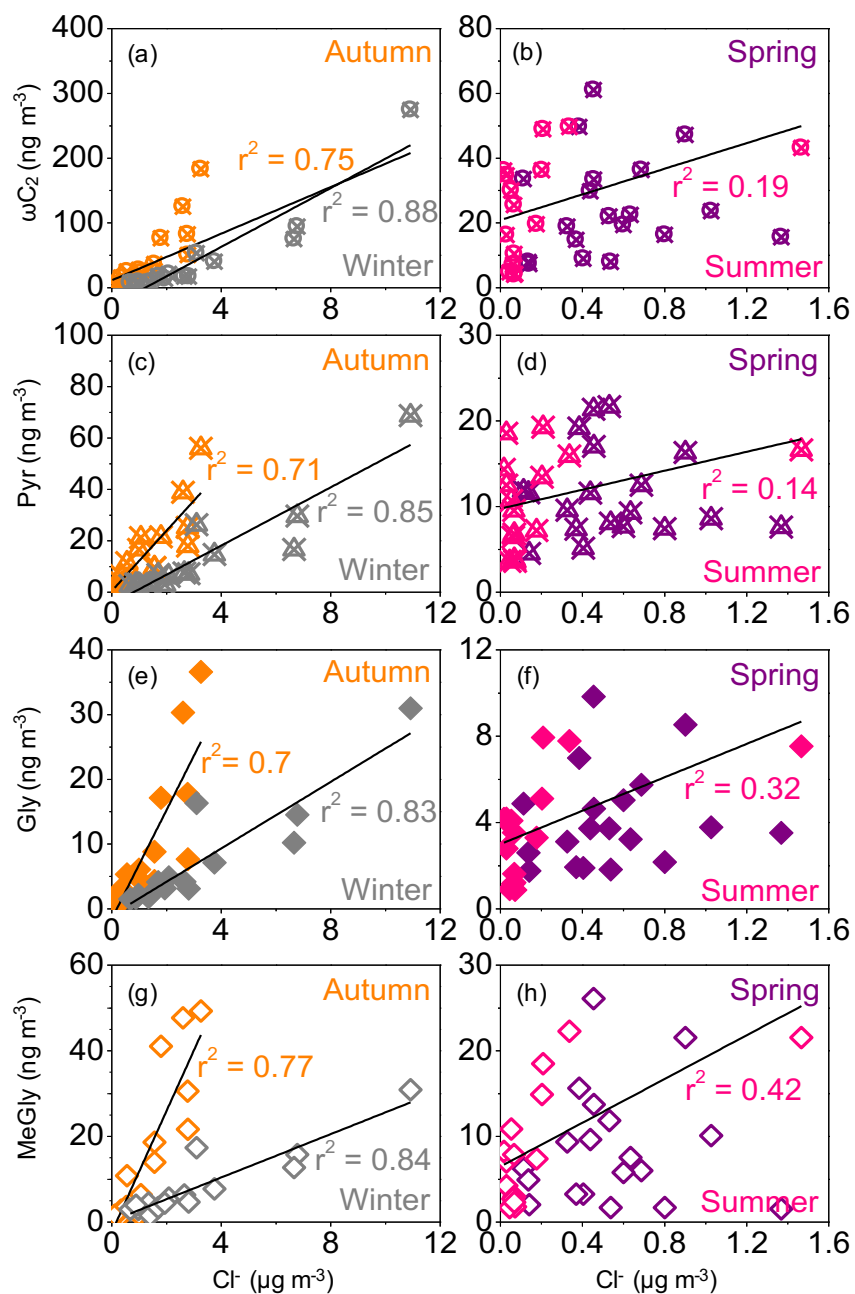

Figure S3. Seasonal relations between  $\omega\text{C}_2$ , Pyr, Gly, MeGly and  $\text{Cl}^-$  concentrations.

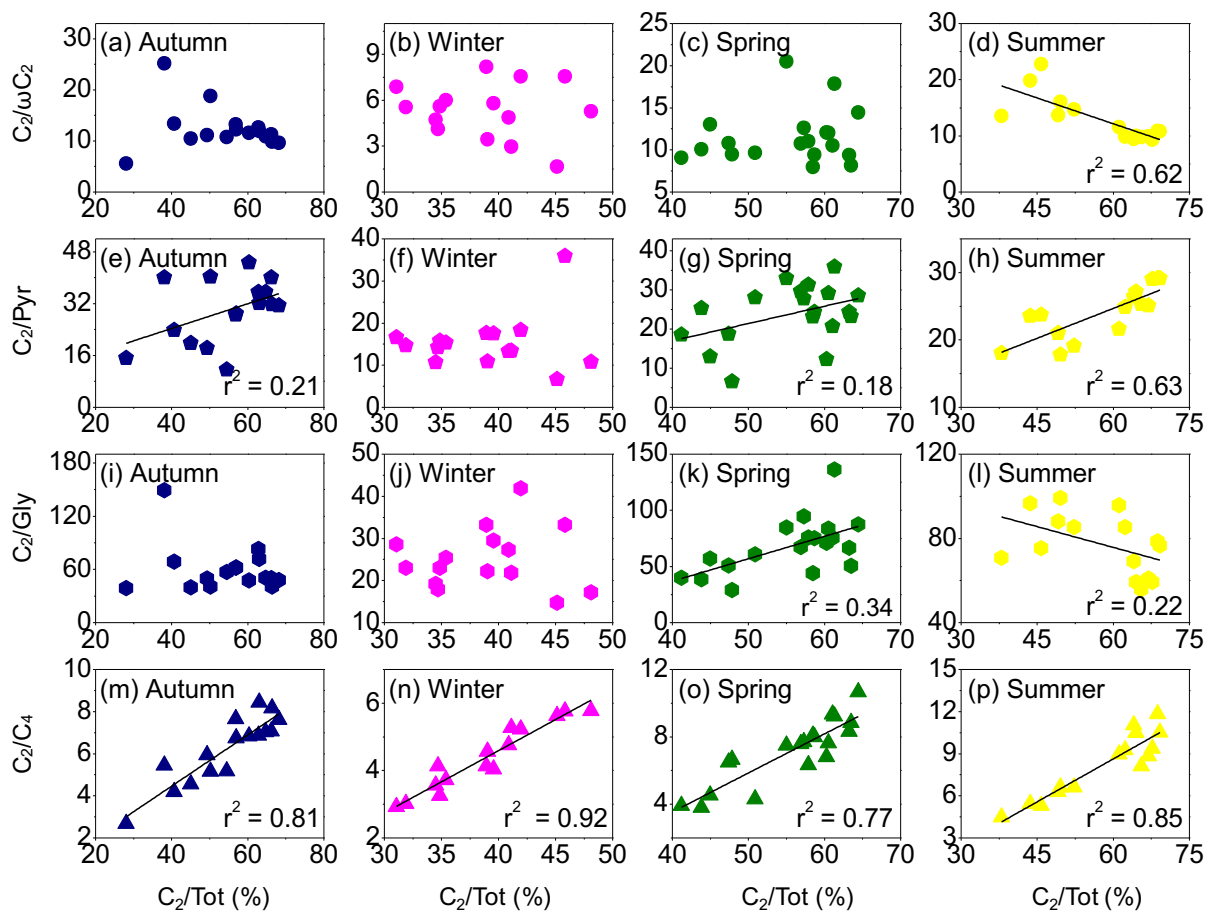

Figure S4. Seasonal relations between  $C_2/\omega C_2$ ,  $C_2/\text{Pyr}$ ,  $C_2/\text{Gly}$ ,  $C_2/C_4$  and  $C_2/\text{total diacids (\%)}$  concentration ratios.
